# Supplementary material
Source: HighWire-hosted journal article supplement (https://www.cmaj.ca/highwire/filestream/59058/field_highwire_adjunct_files/4/dialysis-moist-5-at.pdf)
Supplement: dialysis-moist-5-at.pdf [file dialysis-moist-5-at.pdf]

## Appendix 5: Search strategy, study inclusion flow diagram, and characteristics of included studies (as supplied by the authors)

### Search Strategy for OVID/MEDLINE

#### Set Search Statement

- #1 (start\$ OR initiation OR initiate\$ OR initiating OR timing OR commenc\$).ti.
- #2 (((start\$ OR initiation OR initiate\$ OR initiating OR commenc\$) AND timing) OR ((early\$ OR late\$ OR earlier OR delay\$) adj (start OR initiation))).tw.
- #3 OR/#1-#2
- #4 exp Renal Dialysis/ OR h?emodialy\$.tw. OR dialy\$.ti. OR peritoneal dialysis.mp. OR dialysis patient\$.tw. OR ((end stage OR endstage) adj (kidney OR renal)).ti. OR dialysis therapy.tw. OR exp \*Hemofiltration/ OR \*Renal Replacement Therapy/ OR esrd.ti. OR renal replacement.ti. OR capd.tw. OR ur?emic patient\$.tw. OR h?emofilt\$.tw. OR intradialy\$.tw. OR sevelamer.mp. OR ur?emia.ti. OR tenckhoff\$.tw. OR renal hyperparathyroidism.tw. OR ccpd.tw. OR nephrogenic systemic fibrosis.tw. OR (((((kidney OR renal) adj failure) OR (chronic adj (kidney OR renal))).tw. OR Catheterization, Central Venous/ OR Catheters, Indwelling/ OR renal replacement.mp. OR infection\$.mp. OR erythropoietin\$.mp. OR fistula\$.tw. OR hyperoxaluria.mp.) AND dialysis.tw.) OR (exp Renal Insufficiency/ AND (Catheters, Indwelling/ OR erythropoietin\$.mp. OR Catheterization, Central Venous/ OR an?emi\$.ti. OR nephrogenic.tw. OR amyloid\$.mp.)) OR ((chronic OR end-stage).mp. AND (renal replacement OR azot?emia).tw.) OR (((chronic adj (kidney OR renal)) OR ur?emi\$ OR ckd).ti. AND (inflammation.tw. OR erythropoietin\$.mp. OR renal osteodystrophy.mp. OR hypertrophy.tw.)) OR ((ur?emi\$.ti. OR \*Uremia/) AND (calcification.tw. OR hyperparathyroidism secondary.mp. OR pruritus.mp. OR secondary hyperparathyroidism.tw.)) OR (((kidney OR renal) adj transplant\$) AND candidates).tw. OR (encapsulating.tw. AND sclerosis.mp.)
- #5 #3 AND #4
- #6 ((early\$ OR earlier OR late\$ OR delay\$) adj (dialys\$ OR h?emodialys\$ OR renal replacement)).tw.
- #7 ((start\$ OR initiation OR initiate\$ OR initiating OR timing OR commenc\$) adj3 (chronic dialysis OR dialy\$ OR h?emodialys\$ OR renal replacement)).tw. AND ((eGFR OR mGFR OR (residual adj (renal OR kidney)) OR rGFR OR GFR OR glomerul\$ filtration rate\$ OR cGFR OR (ml\$ adj min) OR MDRD\$).mp. OR (serum albumin OR serum creatinine).tw.)
- #8 (((start\$ OR initiation OR initiate\$ OR initiating OR timing OR commenc\$) adj2 (dialys\$ OR h?emodialys\$)) AND (mortality AND survival)).mp.
- #9 (((start\$ OR initiation OR initiate\$ OR initiating OR timing OR commenc\$) adj2 (dialys\$ OR h?emodialys\$)) AND ((early\$ OR earlier OR late OR later OR delay\$) adj3 (dialysis OR

- h?emodialysis))).tw.
- #10 (initiation adj5 (dialysis OR h?emodialysis)).tw. AND ((eGFR OR mGFR OR (residual adj (renal OR kidney)) OR rGFR OR GFR OR glomerul\$ filtration rate\$ OR cGFR OR (ml\$ adj min) OR MDRD\$).tw. OR Time Factors/ OR Glomerular Filtration Rate/)
  - #11 ((start\$ OR initiation OR initiate\$ OR initiating OR timing OR commenc\$) adj2 (dialys\$ OR h?emodialys\$ OR renal replacement)).tw. AND ((mortality OR morbidity OR death OR died OR prolong\$).tw. OR mo.fs.) AND (survival.tw. OR time factors/ OR risk factor\$.tw.)
  - #12 (peritoneal clearance\$ AND dialysis).ti. AND ((mortality OR morbidity OR death OR died OR prolong\$).tw. OR mo.fs.)
  - #13 OR/#5-#12
  - #14 (aki OR intensive care OR icu OR (acute adj (kidney OR renal))).ti. OR critical.jw.
  - #15 \*Acute Kidney Injury/ NOT \*Kidney Failure,Chronic/
  - #16 ((transplant\$ OR donor\$) NOT (dialys\$ OR h?emodialys\$ OR end-stage)).ti.
  - #17 #13 NOT (#14 OR #15 OR #16)
  - #18 limit #17 to (case reports OR editorial OR letter OR news)
  - #19 #17 NOT #18
  - #20 #19 NOT (animals/ NOT (humans/ OR exp persons/))

**Figure 1: Studies identified and selected through search strategy**

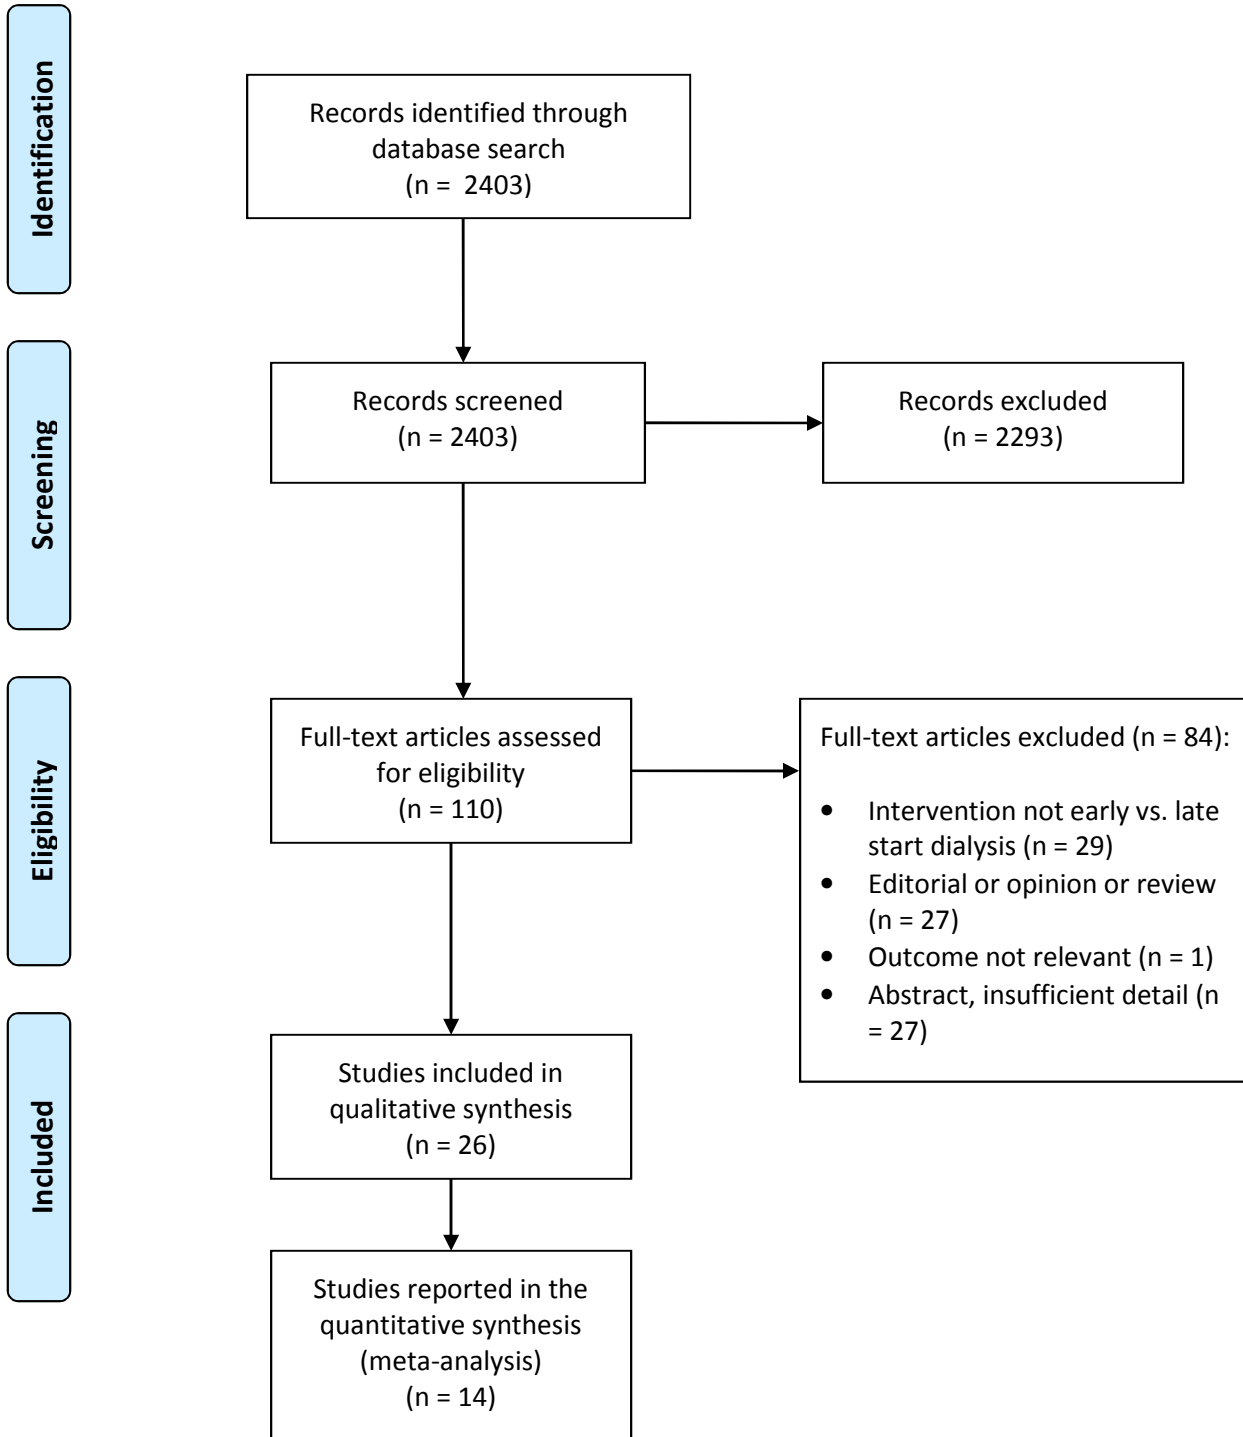

**Table 1:** Characteristics of studies included in systematic review, by outcome

| Author                  | Country | Year | Study design | Data source   | Accrual period  | No. of patients | Dialysis modality | Max f/u length (y) | Mean age (y) | Mean eGFR (early) | Mean eGFR (late) | Men (%) | DM (%) | Reported outcome(s)        |
|-------------------------|---------|------|--------------|---------------|-----------------|-----------------|-------------------|--------------------|--------------|-------------------|------------------|---------|--------|----------------------------|
| Fink <sup>1</sup>       | US      | 1999 | RCS          | Multicentre   | 1995–1996       | 5388            | HD, PD            | 3                  | NR*          | NR                | NR               | 53      | 40‡    | Mortality                  |
| Korevaar <sup>2</sup>   | NL      | 2002 | PCS          | Multicentre   | 1997–1999       | 237             | HD, PD            | 1                  | 56           | 7.1               | 4.9              | 61      | 17‡    | QOL                        |
| Pupim <sup>3</sup>      | US      | 2003 | PCS          | Single centre | NR              | 149             | HD                | 1                  | 55           | NR†               | NR               | 48      | 39     | Hospitalization            |
| Cooper <sup>4</sup>     | AU      | 2003 | RCS          | Single centre | NR              | 134             | NR                | N/A                | —            | NR                | NR               | 56      | 21     | Nutritional status         |
| Tang <sup>5</sup>       | HK      | 2007 | PCS          | Single centre | 2002–2004       | 233             | PD                | 2                  | 58           | 9.2               | 8.9              | 51      | 42     | Hospitalization            |
| Shiao <sup>6</sup>      | TW      | 2008 | RCS          | Single centre | 1997–2005       | 275             | PD                | 6                  | 51           | 6.8               | 3.5              | 45      | 19     | Hospitalization            |
| Kim <sup>7</sup>        | KO      | 2009 | RCS          | Single centre | 2000–2005       | 210             | HD, PD            | 7                  | 50           | 8.0               | 3.4              | 33      | 47     | Mortality, hospitalization |
| Coronel <sup>8</sup>    | SP      | 2009 | RCS          | Single centre | 1982–2004       | 100             | PD                | 5                  | 53           | 10.6              | 5.4              | 65      | 100    | Hospitalization            |
| Rosansky <sup>9</sup>   | US      | 2009 | RCS          | Registry      | NR              | >900 000        | HD, PD            | 1                  | NR           | NR                | NR               | NR      | NR     | Mortality                  |
| Collins <sup>10</sup>   | AU & NZ | 2011 | RCT          | Multicentre   | 2000 – 2008     | 362             | HD                | 7                  | 59           | 9.5               | 9.6              | 73      | 43     | Mortality                  |
| Harris <sup>11</sup>    | AU & NZ | 2011 | RCT          | Multicentre   | 2002 – 2008     | 642             | HD, PD            | 7                  | 60           | 13.1              | 13.2             | 66      | 43     | QOL, hospitalization       |
| Sjolander <sup>12</sup> | SW      | 2011 | PCS          | Multicentre   | 1996–1998       | 441             | HD, PD            | 5                  | NR*          | NR*               | NR*              | 70      | 31     | Mortality                  |
| Korevaar <sup>13</sup>  | NL      | 2001 | PCS          | Registry      | 1997–1999       | 253             | HD, PD            | 3                  | 57           | 7.1               | 1.9              | 62      | NR     | Mortality                  |
| Traynor <sup>14</sup>   | GB      | 2002 | RCS          | Registry      | 1987–2000       | 235             | HD, PD            | 10                 | 55           | NR*               | NR*              | 67      | 22     | Mortality                  |
| Beddhu <sup>15</sup>    | US      | 2003 | RCS          | Registry      | 1996–1997       | 2920            | HD, PD            | 2                  | 59           | 10.9              | 5.6              | 53      | 42     | Mortality                  |
| Kazmi <sup>16</sup>     | US      | 2005 | RCS          | Registry      | 1996–1999       | 302 287         | HD, PD            | 5                  | 62           | NR*               | NR*              | 53      | 48     | Mortality                  |
| Wilson <sup>17</sup>    | CA      | 2007 | RCS          | Single centre | 2001–2005       | 271             | HD                | 2                  | 66           | NR*               | NR*              | 61      | 51     | Mortality                  |
| Sawhney <sup>18</sup>   | GB & CA | 2009 | RCS          | Registry      | 2000–2005       | 7299            | HD, PD            | 5                  | 51           | NR*               | NR*              | 58      | NR     | Mortality                  |
| Stel <sup>19</sup>      | NL      | 2009 | RCS          | Registry      | 1999, 2003      | 11 472          | HD, PD            | 2                  | 64           | NR*               | NR*              | 61      | NR     | Mortality                  |
| Lassalle <sup>20</sup>  | FR      | 2010 | RCS          | Registry      | 2002–2009       | 11 685          | HD, PD            | 4                  | 67           | NR*               | NR*              | 62      | 36     | Mortality                  |
| Hwang <sup>21</sup>     | TW      | 2010 | RCS          | Registry      | 2001–2004       | 23 551          | HD                | 1                  | 62           | NR*               | NR*              | 48      | 50     | Mortality                  |
| Cooper <sup>22</sup>    | AU      | 2010 | RCT          | Multicentre   | 2000–2008       | 828             | HD, PD            | 7                  | 60           | 9.8               | 9.9              | 66      | 43     | Mortality                  |
| Wright <sup>23</sup>    | US      | 2010 | RCS          | Registry      | 1995, 2000–2006 | 611 913         | HD, PD            | 5                  | 65           | NR*               | NR*              | 54      | 57     | Mortality                  |
| Rosansky <sup>24</sup>  | US      | 2011 | RCS          | Registry      | 1996–2006       | 81 176          | HD                | 11                 | 46           | NR*               | NR*              | 58      | 9      | Mortality                  |
| Clark <sup>25</sup>     | CA      | 2011 | RCS          | Registry      | 2001–2007       | 25 910          | HD                | 7                  | 65           | 15.5              | 7.1              | 60      | 46     | Mortality                  |
| Evans <sup>26</sup>     | SW      | 2011 | PCS          | Multicentre   | 1996–1998       | 708             | HD, PD            | 7                  | 57           | 10.8              | 5.5              | 66      | NR     | Mortality                  |

Note: AU=Australia; DM=diabetes mellitus; eGFR=estimated glomerular filtration rate; f/u=follow-up; HD=hemodialysis; HK=Hong Kong; KO=Korea; NL=Netherlands; NR=not reported; NZ=New Zealand; PCS=prospective cohort study, PD=peritoneal dialysis; QOL=quality of life; SP=Spain; SW=Sweden; TW=Taiwan; US=United States.

\*Reported categorically.

†Only mean 24-hour creatinine clearance (mL/min/1.73 m<sup>2</sup>) reported for total sample.

‡Only diabetes mellitus as primary cause of kidney disease was reported.

## References

1. Fink J, Burdick R, Kurth S, Blahut SA, Armistead NC, Turner MS, et al. Significance of serum creatinine values in new end-stage renal disease patients. *Am J Kidney Dis* 1999;34:694-701.
2. Korevaar J, Jansen M, Dekker F, Boeschoten E, Bossuyt P, Krediet R. Evaluation of DOQI guidelines: early start of dialysis treatment is not associated with better health-related quality of life. *Am J Kidney Dis* 2002;39:108-15.
3. Pupim L, Evanson J, Hakim R, Ikizler T. The extent of uremic malnutrition at the time of initiation of maintenance hemodialysis is associated with subsequent hospitalization. *Journal of Renal Nutrition* 2003;13:259-66.
4. Cooper B, Aslani A, Ryan M, Ibels L, Pollock C. Nutritional state correlates with renal function at the start of dialysis. *Perit Dial Int* 2003;23:291-5.
5. Tang S, Ho Y, Tang A, Cheng YY, Chiu FH, Lo WK, et al. Delaying initiation of dialysis till symptomatic uraemia--is it too late? *Nephrol Dial Transplant* 2007;22:1926-32.
6. Shiao C, Huang J, Chien K, Chuang H, Chen Y, Wu K. Early initiation of dialysis and late implantation of catheters adversely affect outcomes of patients on chronic peritoneal dialysis. *Perit Dial Int* 2008;28:73-81.
7. Kim S, Kim N. The effect of residual renal function at the initiation of dialysis on patient survival. *Korean J Intern Med* 2009;24:55-62.
8. Coronel F, Cigarran S, Herrero J. Early initiation of peritoneal dialysis in diabetic patients. *Scand J Urol Nephrol* 2009;43:148-53.
9. Rosansky S, Clark W, Eggers P, Glasscock R. Initiation of dialysis at higher GFRs: is the apparent rising tide of early dialysis harmful or helpful? *Kidney Int* 2009;76:257-61.
10. Collins J, Cooper B, Branley P, Bulfone L, Craig J, Fraenkel M, et al. Outcomes of patients with planned initiation of hemodialysis in the IDEAL trial. *Contrib Nephrol* 2011;171:1-9.
11. Harris A, Cooper B, Li J, Bulfone L, Branley P, Collins JF, et al. Cost-effectiveness of initiating dialysis early: a randomized controlled trial. *Am J Kidney Dis* 2011;57:707-15.
12. Sjölander A, Nyrén O, Bellocco R, Evans M. Comparing different strategies for timing of dialysis initiation through inverse probability weighting. *Am J Epidemiol* 2011;174:1204-10.
13. Korevaar J, Jansen M, Dekker F, Jager KJ, Boeschoten EW, Krediet RT, et al. When to initiate dialysis: effect of proposed US guidelines on survival. *Lancet* 2001;358:1046-50.
14. Traynor J, Simpson K, Geddes C, Deighan C, Fox J. Early initiation of dialysis fails to prolong survival in patients with end-stage renal failure. *J Am Soc Nephrol* 2002;13:2125-32.
15. Beddhu S, Samore M, Roberts M, et al. Impact of timing of initiation of dialysis on mortality. *J Am Soc Nephrol* 2003;14:2305-12.
16. Kazmi W, Gilbertson D, Obrador G, Guo H, Pereira BJ, Collins AJ, et al. Effect of comorbidity on the increased mortality associated with early initiation of dialysis. *Am J Kid Dis* 2005;46:887-96.
17. Wilson B, Harwood L, Locking-Cusolito H, Chen SJ, Heidenheim P, Craik D, et al. Optimal timing of initiation of chronic hemodialysis? *Hemodial Int* 2007;11:263-9.
18. Sawhney S, Djurdjev O, Simpson K, Macleod A, Levin A. Survival and dialysis initiation: comparing British Columbia and Scotland registries. *Nephrol Dial Transplant* 2009;24:3186-92.
19. Stel V, Dekker F, Ansell D, Augustijn H, Casino FG, Collart F, et al. Residual renal function at the start of dialysis and clinical outcomes. *Nephrol Dial Transplant* 2009;24:3175-82.
20. Lassalle M, Labeeuw M, Frimat L, Villar E, Joyeux V, Couchoud C, et al. Age and comorbidity may explain the paradoxical association of an early dialysis start with poor survival. *Kidney Int* 2010;77.
21. Hwang S-J, Yang W-C, Lin M-Y, May L-W, Chen H-C, Taiwan Society of Nephrology. Impact of the clinical conditions at dialysis initiation on mortality in incident haemodialysis patients: a national cohort study in Taiwan. *Nephrol Dial Transplant* 2010;25:2616-24.
22. Cooper B, Branley P, Bulfone L, Collins JF, Craig JC, Fraenkel MB, et al. A randomized, controlled trial of early versus late initiation of dialysis. *N Engl J Med* 2010;363:609-19.
23. Wright S, Klausner D, Baird B, Williams ME, Steinman T, Tang H, et al. Timing of dialysis initiation and survival in ESRD. *Clin J Am Soc Nephrol* 2010;5:1828-35.
24. Rosansky S, Eggers P, Jackson K, Glasscock R, Clark W. Early start of hemodialysis may be harmful. *Arch Intern Med* 2011;171:396-403.
25. Clark W, Na Y, Rosansky S, Sontrop JM, Macnab JJ, Glasscock RJ, et al. Association between estimated glomerular filtration rate at initiation of dialysis and mortality. *CMAJ* 2011;183:47-54.
26. Evans M, Tettamanti G, Nyrén O, Bellocco R, Fored C, Elinder C-G. No survival benefit from early-start dialysis in a population-based, inception cohort study of Swedish patients with chronic kidney disease. *J Intern Med* 2011;269:289-98.
